# Supplementary material for: MYC and Twist1 cooperate to drive metastasis by eliciting crosstalk between cancer and innate immunity
Source: eLife. 2020 Jan 14;9:e50731. doi: 10.7554/eLife.50731 (PMC6959993; doi:10.7554/eLife.50731)
Supplement: Supplementary file 1. [file elife-50731-supp1.xlsx]

## Sheet: Sheet1
Gene Symbol	Gene Name	Log2 Fold Change	Log2 FC unshrunk	p value	p adj
Comp	cartilage oligomeric matrix protein	4.85	5.16	7e-15	1.33e-10
Ctnnbip1	catenin beta interacting protein 1	2.09	2.12	5.01e-11	3.42e-07
Serpina3k	serpin family A member 3	-6.51	-8.45	5.73e-11	3.42e-07
AC154335.2		4.72	5.21	2.81e-10	9.74e-07
Car3	carbonic anhydrase 3	-6.15	-7.78	3.26e-10	9.74e-07
Twist1	twist family bHLH transcription factor 1	5.39	6.04	2.46e-10	9.74e-07
Rbbp7	RB binding protein 7, chromatin remodeling factor	1.3	1.31	1.17e-09	2.62e-06
Sult2a8	sulfotransferase family 2A, dehydroepiandrosterone (DHEA)-preferring, member 8	-6.42	-8.74	1.06e-09	2.62e-06
Ces3a	carboxylesterase 3	-5.97	-7.54	1.7e-09	2.89e-06
Serpina3c	serine (or cysteine) peptidase inhibitor, clade A, member 3C	-5.93	-7.62	1.77e-09	2.89e-06
Ypel4	yippee like 4	3.67	3.9	1.62e-09	2.89e-06
1810010H24Rik	chromosome 17 open reading frame 58	2.83	2.93	2.17e-09	3.24e-06
Mup21	major urinary protein 1	-6.52	-10.08	4.47e-09	6.07e-06
Tnfsf15	TNF superfamily member 15	3.19	3.33	4.74e-09	6.07e-06
Slc4a9	solute carrier family 4 member 9	3.38	3.56	7.69e-09	9.18e-06
Ndufa4l2	NDUFA4, mitochondrial complex associated like 2	2.55	2.63	1.66e-08	1.86e-05
Serpina3m	serine (or cysteine) peptidase inhibitor, clade A, member 3M	-5.26	-6.35	1.96e-08	2.06e-05
Cyp7b1	cytochrome P450 family 7 subfamily B member 1	-6.1	-8.18	2.31e-08	2.3e-05
Colgalt2	collagen beta(1-O)galactosyltransferase 2	2.46	2.53	5.01e-08	4.73e-05
Rbp2	retinol binding protein 2	3.52	3.77	6.55e-08	5.86e-05
Keg1	kidney expressed gene 1	-5.06	-6.1	8.41e-08	7.18e-05
Inmt	indolethylamine N-methyltransferase	-5.01	-6.16	9.42e-08	7.67e-05
Serpina3a	serine (or cysteine) peptidase inhibitor, clade A, member 3A	-5.41	-6.53	1.02e-07	7.68e-05
Ugt2b1	UDP glucuronosyltransferase family 2 member B17	-5.06	-6.21	1.03e-07	7.68e-05
1700029F12Rik	RIKEN cDNA 1700029F12 gene	6.07	8.42	1.28e-07	9.17e-05
Pon1	paraoxonase 1	-5.19	-6.56	1.65e-07	0.00011398
Nat8f2	N-acetyltransferase 8 (GCN5-related) family member 2	-4.88	-5.91	2.6e-07	0.00017222
Mgarp	mitochondria localized glutamic acid rich protein	3.4	3.65	3.15e-07	0.0001964
Ociad2	OCIA domain containing 2	-2.48	-2.58	3.18e-07	0.0001964
Cubn	cubilin	5.09	6.11	3.46e-07	0.00020645
Cyp2j6	cytochrome P450 family 2 subfamily J member 2	-4.38	-5.06	4e-07	0.00023105
Cyp2c29	cytochrome P450 family 2 subfamily C member 8	-5.48	-7.99	5.47e-07	0.00029708
Prlr	prolactin receptor	-4.78	-5.87	5.33e-07	0.00029708
Ces1f	carboxylesterase 1F	-5.3	-7.13	5.93e-07	0.00030177
Eif5al3-ps	eukaryotic translation initiation factor 5A-like 3, pseudogene	4.47	5.18	6.07e-07	0.00030177
Mup3	major urinary protein 3	-5.59	-8.51	5.79e-07	0.00030177
Aldh1a1	aldehyde dehydrogenase 1 family member A1	-4.32	-4.99	6.74e-07	0.00032604
Sgce	sarcoglycan epsilon	3.02	3.2	8.02e-07	0.00037792
Gm8941	predicted gene 8941	-4.68	-5.63	8.29e-07	0.0003806
Cyp2d9	cytochrome P450, family 2, subfamily d, polypeptide 9	-4.54	-5.36	9.57e-07	0.00042835
Mpo	myeloperoxidase	4.29	4.99	1.06e-06	0.00046246
Rpl26	ribosomal protein L26	3.97	4.46	1.21e-06	0.00051744
Cyp1a2	cytochrome P450 family 1 subfamily A member 2	-5.05	-6.68	1.29e-06	0.00053701
Grb10	growth factor receptor bound protein 10	3.25	3.49	1.34e-06	0.00054373
Hemgn	hemogen	3.96	4.45	1.41e-06	0.00056267
Dnaja1	DnaJ heat shock protein family (Hsp40) member A1	-0.91	-0.91	1.7e-06	0.00066368
Nat8f5	N-acetyltransferase 8 (GCN5-related) family member 5	-4.49	-5.53	1.79e-06	0.00068071
Sptb	spectrin beta, erythrocytic	3.18	3.42	1.87e-06	0.0006987
Angptl2	angiopoietin like 2	1.87	1.92	1.96e-06	0.00070328
Hmga1-rs1	high mobility group AT-hook 1B	3.72	4.11	1.96e-06	0.00070328
Chil3	chitinase-like 3	3.83	4.31	2.08e-06	0.00071709
Nat8	N-acetyltransferase 8 (putative)	-4.1	-4.71	2.07e-06	0.00071709
Cyp46a1	cytochrome P450 family 46 subfamily A member 1	-5.47	-8	2.21e-06	0.00073228
Esx1	extraembryonic, spermatogenesis, homeobox 1	3.62	3.99	2.25e-06	0.00073228
Plpp2	phospholipid phosphatase 2	1.16	1.17	2.19e-06	0.00073228
Cnmd	chondromodulin	-4.4	-5.3	2.31e-06	0.00074013
Hspb8	heat shock protein family B (small) member 8	-4.22	-5.01	2.51e-06	0.00078812
Gm867	chromosome 22 open reading frame 15	4.16	5.03	2.57e-06	0.00079455
Akr1c20	aldo-keto reductase family 1, member C20	-4.6	-5.69	2.68e-06	0.00079938
Igsf11	immunoglobulin superfamily member 11	-3.15	-3.39	2.64e-06	0.00079938
Gm34882	predicted gene, 34882	3.64	3.91	2.74e-06	0.00080463
Klhl25	kelch like family member 25	0.88	0.89	2.81e-06	0.00081195
Akr1b7	aldo-keto reductase family 1, member B7	4.04	4.69	2.91e-06	0.00081294
Camp	cathelicidin antimicrobial peptide	4.29	5.1	2.88e-06	0.00081294
Akr1c6	aldo-keto reductase family 1 member C4	-4.96	-6.65	3.29e-06	0.00089272
Slc2a4	solute carrier family 2 member 4	2.78	2.95	3.25e-06	0.00089272
Ar	androgen receptor	-4.7	-5.94	3.6e-06	0.00094492
Mast3	microtubule associated serine/threonine kinase 3	0.93	0.93	3.69e-06	0.00094492
Tmem266	transmembrane protein 266	-3.54	-3.88	3.69e-06	0.00094492
Ugt2b36	UDP glucuronosyltransferase family 2 member B7	-4.14	-4.86	3.69e-06	0.00094492
Spta1	spectrin alpha, erythrocytic 1	3.68	4.1	3.98e-06	0.00100287
Ank1	ankyrin 1	3.65	4.07	4.17e-06	0.00103748
Vldlr	very low density lipoprotein receptor	2.96	3.18	4.31e-06	0.00105827
Liph	lipase H	3.23	3.5	4.47e-06	0.00106764
Rhag	Rh associated glycoprotein	4.04	4.65	4.43e-06	0.00106764
Cyp2e1	cytochrome P450 family 2 subfamily E member 1	-5.19	-7.35	4.86e-06	0.00114524
Ugt2b5	UDP glucuronosyltransferase family 2 member B28	-3.78	-4.31	4.94e-06	0.00114962
Pglyrp1	peptidoglycan recognition protein 1	2.38	2.48	5.12e-06	0.00117616
Apol11b	apolipoprotein L 11b	4.01	4.72	5.31e-06	0.0011971
Chpt1	choline phosphotransferase 1	-3.28	-3.59	5.35e-06	0.0011971
Ces1d	carboxylesterase 1	-4.36	-5.27	5.68e-06	0.00124053
Cldn13	claudin 13	3.85	4.39	5.66e-06	0.00124053
Aox3	aldehyde oxidase 3	-4.75	-6.23	6.48e-06	0.0013872
Mettl7b	methyltransferase like 7B	-4.48	-5.77	6.6e-06	0.0013872
Slc2a3	solute carrier family 2 member 3	2.94	3.15	6.51e-06	0.0013872
Vmn1r51	vomeronasal 1 receptor 51	-5.09	-7.09	6.66e-06	0.0013872
Tram2	translocation associated membrane protein 2	1.08	1.09	6.77e-06	0.00139279
Gm14539	predicted gene 14539	-2.84	-3.01	6.91e-06	0.0014057
C4bp	complement component 4 binding protein	-4.11	-4.91	7.3e-06	0.00146878
Atp7a	ATPase copper transporting alpha	1.76	1.81	7.64e-06	0.00150309
Glyat	glycine-N-acyltransferase	-4.08	-4.82	7.59e-06	0.00150309
Ermap	erythroblast membrane associated protein (Scianna blood group)	3.95	4.54	7.98e-06	0.00155278
Notum	notum, palmitoleoyl-protein carboxylesterase	-4.5	-5.61	8.26e-06	0.00156977
Slc14a1	solute carrier family 14 member 1 (Kidd blood group)	3.2	3.5	8.2e-06	0.00156977
Sqor	sulfide quinone oxidoreductase	-3.69	-4.21	8.33e-06	0.00156977
Aifm3	apoptosis inducing factor, mitochondria associated 3	1.5	1.53	9e-06	0.00166147
Cyp2f2	cytochrome P450 family 2 subfamily F member 1	-4.23	-5.19	8.95e-06	0.00166147
Peg10	paternally expressed 10	3.86	4.37	9.09e-06	0.00166147
Adh4	alcohol dehydrogenase 4 (class II), pi polypeptide	-3.72	-4.26	9.37e-06	0.00168603
Cass4	Cas scaffolding protein family member 4	4.16	5.15	9.48e-06	0.00168603
Ces3b	carboxylesterase 3B	-5.19	-10.03	9.58e-06	0.00168603
Nrip2	nuclear receptor interacting protein 2	2.11	2.19	9.6e-06	0.00168603
Elane	elastase, neutrophil expressed	3.75	4.32	9.83e-06	0.00170968
Plod2	procollagen-lysine,2-oxoglutarate 5-dioxygenase 2	3.45	3.81	1.08e-05	0.00186459
A530016L24Rik	chromosome 14 open reading frame 180	3.89	4.82	1.14e-05	0.00193854
Mfsd2a	major facilitator superfamily domain containing 2A	-4.75	-6.62	1.15e-05	0.00194242
Ces1g	carboxylesterase 1G	-4.28	-5.23	1.18e-05	0.00197135
Apon	apolipoprotein N	-3.96	-4.72	1.24e-05	0.00204854
Cyp4f14	cytochrome P450 family 4 subfamily F member 12	-4.71	-6.39	1.29e-05	0.00210403
Snx21	sorting nexin family member 21	1.78	1.83	1.29e-05	0.00210403
Apoa5	apolipoprotein A5	-4.23	-5.11	1.32e-05	0.00212018
Cpm	carboxypeptidase M	2.07	2.14	1.33e-05	0.00212018
Gpc3	glypican 3	3.85	4.45	1.34e-05	0.00212018
Mmp8	matrix metallopeptidase 8	3.28	3.63	1.39e-05	0.00218206
Myo18b	myosin XVIIIB	2.28	2.37	1.44e-05	0.00224805
Cd40	CD40 molecule	3	3.25	1.49e-05	0.00227881
Dhdds	dehydrodolichyl diphosphate synthase subunit	0.65	0.66	1.49e-05	0.00227881
Kcng1	potassium voltage-gated channel modifier subfamily G member 1	5.27	7.17	1.55e-05	0.00231386
Scara5	scavenger receptor class A member 5	-4.08	-4.93	1.54e-05	0.00231386
Tal1	TAL bHLH transcription factor 1, erythroid differentiation factor	2.85	3.05	1.54e-05	0.00231386
Cyp2j5	cytochrome P450, family 2, subfamily j, polypeptide 5	-4.83	-6.79	1.57e-05	0.00231859
Reck	reversion inducing cysteine rich protein with kazal motifs	1.97	2.03	1.58e-05	0.00232133
Hexb	hexosaminidase subunit beta	1.15	1.16	1.63e-05	0.00237903
Akr1c14	aldo-keto reductase family 1, member C14	-4.18	-5.14	1.65e-05	0.00238934
Cyp2c54	cytochrome P450, family 2, subfamily c, polypeptide 54	-4.94	-7.4	1.92e-05	0.00272329
S100a8	S100 calcium binding protein A8	3.47	3.9	1.91e-05	0.00272329
Lect2	leukocyte cell derived chemotaxin 2	-3.86	-4.67	1.99e-05	0.00277742
Mtmr14	myotubularin related protein 14	0.61	0.61	1.98e-05	0.00277742
Foxo4	forkhead box O4	1.05	1.06	2.19e-05	0.00301658
Gm20426	predicted gene 20426	-4.59	-6.29	2.18e-05	0.00301658
Gm10053	predicted gene 10053	-3.21	-3.53	2.23e-05	0.00304517
Cyp2a5	cytochrome P450 family 2 subfamily A member 6	-4.65	-6.67	2.35e-05	0.00317781
Cyp2c37	cytochrome P450, family 2. subfamily c, polypeptide 37	-4.59	-6.22	2.36e-05	0.00317781
Gm1821	predicted gene 1821	4.4	5.82	2.38e-05	0.00317781
Upp2	uridine phosphorylase 2	-3.56	-4.05	2.4e-05	0.00317831
Chn2	chimerin 2	-3.48	-3.98	2.43e-05	0.00319864
Pdilt	protein disulfide isomerase like, testis expressed	-4.44	-6.12	2.45e-05	0.00320704
Serpinb8	serpin family B member 8	-3.39	-3.82	2.49e-05	0.00322507
Mug1	murinoglobulin 1	-4.61	-6.07	2.54e-05	0.00326651
Atg13	autophagy related 13	0.9	0.91	2.64e-05	0.00337118
Gfra1	GDNF family receptor alpha 1	-4.07	-4.93	2.67e-05	0.00337316
Sdr9c7	short chain dehydrogenase/reductase family 9C member 7	-4.49	-5.88	2.66e-05	0.00337316
Gmpr	guanosine monophosphate reductase	2.83	3.05	2.77e-05	0.00346869
Eif5	eukaryotic translation initiation factor 5	-0.51	-0.51	2.85e-05	0.00351167
Prom1	prominin 1	4.15	5.07	2.85e-05	0.00351167
Slco1b2	solute carrier organic anion transporter family member 1B3	-3.87	-4.54	2.86e-05	0.00351167
mt-Tl1	mitochondrially encoded tRNA leucine 1	-2.01	-2.09	2.93e-05	0.00355952
Nlrp12	NLR family pyrin domain containing 12	-4.31	-5.48	2.94e-05	0.00355952
Cyp2c67	cytochrome P450, family 2, subfamily c, polypeptide 40	-3.82	-4.46	3.17e-05	0.00375652
Klf10	Kruppel like factor 10	-0.87	-0.87	3.17e-05	0.00375652
Ppbp	pro-platelet basic protein	3.15	3.48	3.16e-05	0.00375652
Fcnb	ficolin 1	3.71	4.34	3.25e-05	0.00377318
Igfbp1	insulin like growth factor binding protein 1	1.92	1.98	3.26e-05	0.00377318
Me1	malic enzyme 1	-2.96	-3.25	3.22e-05	0.00377318
Retnlg	resistin like gamma	3.6	4.17	3.27e-05	0.00377318
Sult2a3	sulfotransferase family 2A member 1	-4.96	-7.63	3.44e-05	0.00394757
Bcl11a	B cell CLL/lymphoma 11A	3.35	3.73	3.48e-05	0.00397508
Ppp1r26	protein phosphatase 1 regulatory subunit 26	-2.9	-3.12	3.7e-05	0.00419251
Cyp2c50	cytochrome P450, family 2, subfamily c, polypeptide 50	-4.73	-7.08	3.81e-05	0.00428937
Gm16548	predicted gene 16548	-4.5	-6.95	3.99e-05	0.00440845
Mug2	murinoglobulin 2	-4.33	-5.74	3.98e-05	0.00440845
Ugt2a3	UDP glucuronosyltransferase family 2 member A3	-4.09	-5.07	3.95e-05	0.00440845
Slc4a1	solute carrier family 4 member 1 (Diego blood group)	3.43	3.87	4.03e-05	0.00442503
Ubqln2	ubiquilin 2	1.16	1.17	4.32e-05	0.0047208
3930402G23Rik	RIKEN cDNA 3930402G23 gene	2.57	2.74	4.51e-05	0.00483765
Psmb7	proteasome subunit beta 7	-0.62	-0.62	4.49e-05	0.00483765
Trim10	tripartite motif containing 10	3.27	3.65	4.47e-05	0.00483765
Fam25c	family with sequence similarity 25, member C	-4.04	-5.2	4.56e-05	0.00485723
Baat	bile acid-CoA:amino acid N-acyltransferase	-3.19	-3.57	4.68e-05	0.00496356
Ebf3	early B cell factor 3	-4.45	-6.24	4.72e-05	0.00496829
Skp1a	S-phase kinase associated protein 1	-0.62	-0.62	4.83e-05	0.00505695
Arhgef9	Cdc42 guanine nucleotide exchange factor 9	-3.24	-3.63	4.99e-05	0.00520044
S100a9	S100 calcium binding protein A9	3.21	3.57	5.03e-05	0.005202
Pgm2	phosphoglucomutase 1	0.8	0.81	5.17e-05	0.00531681
B3galt1	beta-1,3-galactosyltransferase 1	-4.06	-5.06	5.29e-05	0.00538528
Gypa	glycophorin A	3.52	4.02	5.27e-05	0.00538528
Pigr	polymeric immunoglobulin receptor	-3.96	-4.82	5.36e-05	0.0054213
Ngp	neutrophilic granule protein	3.63	4.23	5.5e-05	0.00553836
Gfi1b	growth factor independent 1B transcriptional repressor	3.48	4.03	5.62e-05	0.00562596
Gp1ba	glycoprotein Ib platelet alpha subunit	2.62	2.81	5.7e-05	0.00566975
Ripor3	RIPOR family member 3	2.22	2.32	5.73e-05	0.00566975
Hsd3b1	hydroxy-delta-5-steroid dehydrogenase, 3 beta- and steroid delta-isomerase 2	1.67	1.71	5.84e-05	0.00574908
Slc17a8	solute carrier family 17 member 8	-3.78	-4.54	5.92e-05	0.00579372
Mfsd4b1	major facilitator superfamily domain containing 4B	-4.04	-5.21	6.25e-05	0.00605403
Pld1	phospholipase D1	1.55	1.59	6.24e-05	0.00605403
Lrit1	leucine rich repeat, Ig-like and transmembrane domains 1	-4.1	-5.31	6.35e-05	0.00610907
Faim	Fas apoptotic inhibitory molecule	-0.62	-0.63	6.47e-05	0.00616714
Samd13	RIKEN cDNA 4930503B20 gene	3.61	4.33	6.47e-05	0.00616714
Gata1	GATA binding protein 1	3.63	4.29	6.55e-05	0.00620618
Rhd	Rh blood group D antigen	3.25	3.66	6.75e-05	0.00636377
Myb	MYB proto-oncogene, transcription factor	2.93	3.24	6.99e-05	0.00655173
Ptger3	prostaglandin E receptor 3	4.22	5.28	7.05e-05	0.00657938
AC159294.1		-4.42	-6.34	7.17e-05	0.00662344
Wfdc21	WAP four-disulfide core domain 21	-4.25	-5.74	7.18e-05	0.00662344
Angptl4	angiopoietin like 4	-1.62	-1.66	7.34e-05	0.00668941
Cabp7	calcium binding protein 7	4.66	5.99	7.3e-05	0.00668941
Gm11407	predicted gene 11407	-2.14	-2.25	7.36e-05	0.00668941
Ube2q2	ubiquitin conjugating enzyme E2 Q2	-0.65	-0.65	7.81e-05	0.00706321
Fabp3	fatty acid binding protein 3	-3.35	-3.69	7.96e-05	0.00716004
Asap3	ArfGAP with SH3 domain, ankyrin repeat and PH domain 3	0.91	0.92	8.06e-05	0.0072187
Ugt3a2	UDP glycosyltransferase family 3 member A1	-4.2	-5.44	8.48e-05	0.00755615
Sucnr1	succinate receptor 1	-4.01	-5.05	8.54e-05	0.00756838
Dnaic2	dynein axonemal intermediate chain 2	3.06	3.38	8.6e-05	0.0075839
Eef2k	eukaryotic elongation factor 2 kinase	1.02	1.03	9.27e-05	0.0081384
Hsf2	heat shock transcription factor 2	-0.42	-0.42	9.54e-05	0.00833697
Gm10925	predicted gene 10925	-4.36	-5.48	9.73e-05	0.00846265
Pde6c	phosphodiesterase 6C	2.9	3.19	0.00010007	0.00865708
Polr2k	RNA polymerase II subunit K	-1.46	-1.49	0.0001022	0.00879865
Cd24a	CD24a antigen	2.94	3.24	0.0001028	0.00880862
Tac2	tachykinin 3	3.61	4.36	0.00010561	0.00900606
Gm45855	predicted gene 45855	-2.89	-3.13	0.00010679	0.00906336
Ugt1a1	UDP glucuronosyltransferase family 1 member A1	-3.82	-4.69	0.00011444	0.0096665
Ccdc74a	coiled-coil domain containing 74A	1.98	2.06	0.00011934	0.0100334
Dio1	iodothyronine deiodinase 1	-3.53	-4.47	0.00012019	0.0100574
Crls1	cardiolipin synthase 1	-0.77	-0.78	0.00012456	0.0103751
Mid1ip1	MID1 interacting protein 1	-1.36	-1.39	0.00012516	0.0103768
C9	complement C9	-3.77	-4.63	0.00012641	0.0104318
Abcc5	ATP binding cassette subfamily C member 5	1.26	1.28	0.00012799	0.0104699
Myoc	myocilin	4.71	7.47	0.00012862	0.0104699
Slco1a1	solute carrier organic anion transporter family, member 1a1	-4.44	-6.64	0.00012855	0.0104699
Nox4	NADPH oxidase 4	-3.84	-4.73	0.00013243	0.0107312
Klhl13	kelch like family member 13	2.79	3.05	0.00013601	0.0109698
Vwce	von Willebrand factor C and EGF domains	1.09	1.1	0.0001366	0.0109698
Aqp9	aquaporin 9	-3.53	-4.18	0.00013807	0.011026
Zfp809	zinc finger protein 809	-1.12	-1.14	0.00013853	0.011026
Acsm2	acyl-CoA synthetase medium chain family member 2A	-4.21	-6.11	0.00014189	0.0110962
Hpgd	15-hydroxyprostaglandin dehydrogenase	-2.49	-2.68	0.00014168	0.0110962
Nudt11	nudix hydrolase 11	4.62	6.19	0.00014098	0.0110962
Palmd	palmdelphin	-2.94	-3.31	0.00014048	0.0110962
Slc22a1	solute carrier family 22 member 1	-3.35	-3.93	0.00014258	0.0111011
Igf1r	insulin like growth factor 1 receptor	2.4	2.56	0.00014393	0.0111579
Orm1	orosomucoid 1	-3.69	-4.62	0.00014456	0.0111585
Chrm3	cholinergic receptor muscarinic 3	-3.93	-4.75	0.00014791	0.0112715
Ido2	indoleamine 2,3-dioxygenase 2	-4.03	-5.24	0.00014748	0.0112715
Slc10a2	solute carrier family 10 member 2	-4.24	-5.82	0.00014775	0.0112715
AC156572.1		-3.25	-3.81	0.00015871	0.0120321
Olr1	oxidized low density lipoprotein receptor 1	3.74	4.83	0.00015946	0.0120321
Slco4c1	solute carrier organic anion transporter family member 4C1	4.39	5.97	0.00015991	0.0120321
Cd177	CD177 molecule	3.47	4.14	0.00016261	0.0121331
Slc6a19	solute carrier family 6 member 19	1.65	1.69	0.00016216	0.0121331
Gm20319	predicted gene, 20319	-3.53	-4.22	0.00016565	0.0123089
Nipsnap2	nipsnap homolog 2	0.78	0.78	0.00016838	0.0124603
Chrna2	cholinergic receptor nicotinic alpha 2 subunit	-3.31	-3.84	0.00016909	0.012461
G6b	megakaryocyte and platelet inhibitory receptor G6b	3.17	3.82	0.00016988	0.0124683
Letm1	leucine zipper and EF-hand containing transmembrane protein 1	-0.52	-0.52	0.0001707	0.0124773
Ces1b	carboxylesterase 1C	-3.66	-4.5	0.00017846	0.0128349
Hsd17b6	hydroxysteroid 17-beta dehydrogenase 6	-4.28	-5.9	0.00017783	0.0128349
Med21	mediator complex subunit 21	-0.88	-0.89	0.0001781	0.0128349
Ugt1a9	UDP glucuronosyltransferase family 1 member A9	-3.62	-4.36	0.00017694	0.0128349
Cacna1b	calcium voltage-gated channel subunit alpha1 B	3.44	4.05	0.00018058	0.0129242
Cyp2u1	cytochrome P450 family 2 subfamily U member 1	-2.89	-3.26	0.00018187	0.0129242
Slc1a2	solute carrier family 1 member 2	-4.23	-5.94	0.00018147	0.0129242
Kcns1	potassium voltage-gated channel modifier subfamily S member 1	4.26	5.35	0.00018428	0.0130436
Magt1	magnesium transporter 1	0.58	0.58	0.00018523	0.0130595
Tcea1	transcription elongation factor A1	-0.77	-0.77	0.00018604	0.013065
Cpt1a	carnitine palmitoyltransferase 1A	-1.09	-1.1	0.00018817	0.0131628
AC121988.1		2.69	2.92	0.00019072	0.0132541
Pisd-ps2	phosphatidylserine decarboxylase, pseudogene 2	1	1.01	0.00019095	0.0132541
Kel	Kell blood group, metallo-endopeptidase	2.79	3.05	0.00019198	0.0132742
Dcun1d1	defective in cullin neddylation 1 domain containing 1	-0.53	-0.53	0.00019538	0.0133545
Sema3b	semaphorin 3B	2.87	3.19	0.00019444	0.0133545
Tdrd7	tudor domain containing 7	1.28	1.3	0.00019497	0.0133545
Raet1e	retinoic acid early transcript 1E	-3.69	-4.71	0.00019792	0.0134764
Creb3l2	cAMP responsive element binding protein 3 like 2	1.17	1.19	0.00020015	0.0135765
Cyp4f15	cytochrome P450 family 4 subfamily F member 8	-3.73	-4.6	0.00020194	0.0136019
Syt1	synaptotagmin 1	-3.75	-4.66	0.00020204	0.0136019
Slc22a5	solute carrier family 22 member 5	-1.34	-1.37	0.00020665	0.0138601
Cyp7a1	cytochrome P450 family 7 subfamily A member 1	-3.42	-4.05	0.00021198	0.0141647
Plekhb1	pleckstrin homology domain containing B1	-2.74	-3.01	0.00021488	0.0142586
Slc16a10	solute carrier family 16 member 10	-0.9	-0.91	0.00021516	0.0142586
Uimc1	ubiquitin interaction motif containing 1	-0.45	-0.45	0.00021577	0.0142586
Arfgap3	ADP ribosylation factor GTPase activating protein 3	1.23	1.25	0.00022009	0.0143843
Rpl18-ps1	ribosomal protein L18, pseudogene 1	1.15	1.16	0.00022006	0.0143843
Rpl36a-ps2	ribosomal protein L36A, pseudogene 2	1.59	1.63	0.00021936	0.0143843
Ace2	angiotensin I converting enzyme 2	2.83	3.16	0.00022287	0.0144083
Ndrg1	N-myc downstream regulated 1	1.49	1.53	0.00022207	0.0144083
Zbtb44	zinc finger and BTB domain containing 44	-0.57	-0.57	0.00022182	0.0144083
Plin3	perilipin 3	0.8	0.81	0.00022498	0.0144925
Susd4	sushi domain containing 4	-4.28	-6.2	0.00022691	0.0145647
0610031O16Rik	RIKEN cDNA 0610031O16 gene	-4.1	-5.72	0.0002348	0.0147017
Acaa1b	acetyl-Coenzyme A acyltransferase 1B	-2.62	-2.86	0.00023129	0.0147017
Chordc1	cysteine and histidine rich domain containing 1	-0.65	-0.65	0.00023259	0.0147017
mt-Ta	mitochondrially encoded tRNA alanine	-2.57	-2.8	0.00023536	0.0147017
Pf4	platelet factor 4	2.22	2.36	0.00023424	0.0147017
Phax	phosphorylated adaptor for RNA export	-0.64	-0.64	0.00023377	0.0147017
Phyhip	phytanoyl-CoA 2-hydroxylase interacting protein	2.67	2.93	0.00023562	0.0147017
Sco1	SCO1, cytochrome c oxidase assembly protein	-0.55	-0.55	0.00023392	0.0147017
Ddo	D-aspartate oxidase	-3.83	-5.04	0.00023876	0.014846
Wrnip1	Werner helicase interacting protein 1	-0.65	-0.65	0.00024039	0.0148959
Hsd3b5	hydroxy-delta-5-steroid dehydrogenase, 3 beta- and steroid delta-isomerase 4	-4.48	-10.65	0.00024331	0.015025
Ctdsp2	CTD small phosphatase 2	0.78	0.78	0.00024693	0.0151962
Fras1	Fraser extracellular matrix complex subunit 1	3.1	3.51	0.00024979	0.0153194
CT010463.1		3.55	4.39	0.00025591	0.0153783
Gm5620	predicted gene 5620	-2.64	-2.85	0.00025358	0.0153783
Nrk	Nik related kinase	4.58	9.05	0.00025529	0.0153783
Serpina4-ps1	serine (or cysteine) peptidase inhibitor, clade A, member 4, pseudogene 1	-3.39	-3.96	0.00025479	0.0153783
Slc22a30	solute carrier family 22 member 25	-4.35	-7.16	0.0002554	0.0153783
Smim11	small integral membrane protein 11	-0.72	-0.72	0.00025177	0.0153783
Tdrd9	tudor domain containing 9	3.6	4.46	0.00025719	0.0154041
Rptoros	regulatory associated protein of MTOR, complex 1, opposite strand	3.77	4.55	0.00025854	0.0154333
Enpp2	ectonucleotide pyrophosphatase/phosphodiesterase 2	-3.21	-3.77	0.00026543	0.0157915
Amd2	adenosylmethionine decarboxylase 1	1.32	1.35	0.00027162	0.0161063
Gm4756	predicted gene 4756	-4.3	-6.69	0.00027252	0.0161065
Hsd3b2	hydroxy-delta-5-steroid dehydrogenase, 3 beta- and steroid delta-isomerase 1	-3.02	-3.42	0.00027353	0.0161131
Rab44	RAB44, member RAS oncogene family	2.98	3.39	0.00027655	0.0161939
Tmem71	transmembrane protein 71	1.51	1.55	0.00027671	0.0161939
Ces1c	carboxylesterase 1C	-3.47	-4.17	0.0002878	0.016788
Myo1c	myosin IC	0.82	0.82	0.00029931	0.0174028
Ank3	ankyrin 3	1.1	1.11	0.00030032	0.0174047
Apoc3	apolipoprotein C-III	-3.12	-3.6	0.00031376	0.0180864
Gstp-ps	glutathione S-transferase pi 1	-1.38	-1.41	0.0003141	0.0180864
Gulo	gulonolactone (L-) oxidase	-3.45	-4.13	0.00031631	0.0181556
Gm9844	predicted pseudogene 9844	-3.39	-3.92	0.00031826	0.0181731
Ism2	isthmin 2	3.28	3.79	0.00031865	0.0181731
Meiob	meiosis specific with OB domains	-3.07	-3.56	0.00032229	0.0182642
Zbtb7c	zinc finger and BTB domain containing 7C	2.52	2.73	0.00032216	0.0182642
Lama3	laminin subunit alpha 3	-2.55	-2.78	0.00032623	0.0184292
Dnajc21	DnaJ heat shock protein family (Hsp40) member C21	-0.56	-0.57	0.00033257	0.01867
Elmo2	engulfment and cell motility 2	1.54	1.58	0.00033168	0.01867
Cyp3a11	cytochrome P450 family 3 subfamily A member 5	-3.58	-4.44	0.00033921	0.0188472
Hopx	HOP homeobox	-3.23	-3.9	0.00033828	0.0188472
Ndufa12	NADH:ubiquinone oxidoreductase subunit A12	-1.28	-1.31	0.00033994	0.0188472
Thap4	THAP domain containing 4	-0.49	-0.49	0.00033919	0.0188472
Nudt7	nudix hydrolase 7	-2.64	-2.93	0.00034372	0.0189909
Pex11a	peroxisomal biogenesis factor 11 alpha	-2.31	-2.48	0.00034492	0.0189909
Slc22a7	solute carrier family 22 member 7	-3.93	-5.46	0.00034599	0.0189909
Slc2a1	solute carrier family 2 member 1	1.01	1.02	0.00034677	0.0189909
Igfbp5	insulin like growth factor binding protein 5	-2.03	-2.13	0.00034898	0.0190535
Rxrg	retinoid X receptor gamma	-3.98	-5.92	0.00035227	0.0191724
Serpinb1a	serpin family B member 1	-3.22	-3.72	0.0003533	0.0191724
Tmem52	transmembrane protein 52	1.95	2.04	0.00035676	0.0192734
Vmn1r-ps32	vomeronasal 1 receptor, pseudogene 32	-4.23	-6.23	0.00035731	0.0192734
I830127L07Rik	RIKEN cDNA I830127L07 gene	2.99	3.44	0.00036623	0.0196953
Camk2b	calcium/calmodulin dependent protein kinase II beta	-3.72	-4.7	0.00036857	0.0197616
Cyp2r1	cytochrome P450 family 2 subfamily R member 1	-3.35	-4.01	0.00037002	0.0197798
Cyp2g1	cytochrome P450, family 2, subfamily g, polypeptide 1	-3.79	-5.67	0.00037243	0.0198498
Hsph1	heat shock protein family H (Hsp110) member 1	-1	-1.01	0.00037591	0.0199758
Sgk2	SGK2, serine/threonine kinase 2	1.52	1.57	0.00037829	0.0200425
Cyp2d10	cytochrome P450, family 2, subfamily d, polypeptide 10	-3.2	-3.76	0.00038401	0.0202858
Gm35570	predicted gene, 35570	-3.26	-3.87	0.00039406	0.0207529
Sdr16c5	short chain dehydrogenase/reductase family 16C member 5	4.06	5.67	0.00039517	0.0207529
Ugt2b38	UDP glucuronosyltransferase 2 family, polypeptide B38	-3.54	-4.85	0.00039717	0.0207967
Fmr1nb	Fmr1 neighbor	3.12	3.59	0.00039931	0.0208478
Nipal1	NIPA like domain containing 1	1.69	1.75	0.00040111	0.0208812
Prrg1	proline rich and Gla domain 1	-1.59	-1.64	0.00040525	0.0210353
C6	complement C6	-3.51	-4.23	0.00040934	0.0211864
Prkar2b	protein kinase cAMP-dependent type II regulatory subunit beta	1.83	1.9	0.00041286	0.0213071
Rdh16	retinol dehydrogenase 16 (all-trans)	-4.12	-6.01	0.0004149	0.0213508
Mfsd2b	major facilitator superfamily domain containing 2B	2.11	2.24	0.000426	0.0217565
Naaladl1	N-acetylated alpha-linked acidic dipeptidase like 1	3.21	3.75	0.00042643	0.0217565
Selenow	selenoprotein W	-1.5	-1.54	0.00042643	0.0217565
Apol9a	apolipoprotein L 9b	-3.23	-3.89	0.00043346	0.0219896
Tbx3os1	T-box 3, opposite strand 1	-4	-5.73	0.00043257	0.0219896
Ankrd55	ankyrin repeat domain 55	-3.12	-3.6	0.00043629	0.022071
Miox	myo-inositol oxygenase	2.87	3.33	0.00044113	0.0221904
Znrf2	zinc and ring finger 2	-0.47	-0.47	0.00044082	0.0221904
Gm5340	predicted gene 5340	2.03	2.15	0.0004495	0.0225482
Apol9b	apolipoprotein L 9b	-3.4	-4.26	0.00045425	0.0227226
Tchh	trichohyalin	-3.56	-5.11	0.00046523	0.0232073
9630013D21Rik	RIKEN cDNA 9630013D21 gene	-2.97	-3.5	0.0004708	0.0234197
Samd11	sterile alpha motif domain containing 11	2.84	3.2	0.00047638	0.0236315
Mbl2	mannose binding lectin 2	-3	-3.51	0.00048462	0.0239741
Syt3	synaptotagmin 3	-3.23	-3.87	0.00049711	0.0245241
Msrb2	methionine sulfoxide reductase B2	-3.17	-3.77	0.00050388	0.0247899
Dhrs9	dehydrogenase/reductase 9	2.41	2.61	0.00050805	0.0249266
Dpys	dihydropyrimidinase	-3.32	-3.94	0.00051242	0.0250041
Glt8d1	glycosyltransferase 8 domain containing 1	0.66	0.67	0.00051116	0.0250041
Mbl1	mannose-binding lectin (protein A) 1	-3.03	-3.52	0.0005225	0.0253575
Vgll4	vestigial like family member 4	-0.78	-0.78	0.00052164	0.0253575
Tubb1	tubulin beta 1 class VI	3.14	3.77	0.00052716	0.0255145
Gm4788	predicted gene 4788	-3.21	-3.81	0.00053847	0.0259915
Rps4l	ribosomal protein S4-like	-3.35	-4.08	0.00055926	0.0269229
Gm5834	predicted pseudogene 5834	-3.09	-3.61	0.00056441	0.0270417
Pck1	phosphoenolpyruvate carboxykinase 1	-3.69	-5.01	0.00056475	0.0270417
Ctsg	cathepsin G	3.02	3.54	0.00056658	0.027057
Prok1	prokineticin 1	-2.76	-3.12	0.00057302	0.027104
Rab32	RAB32, member RAS oncogene family	-1.84	-1.93	0.00057362	0.027104
Rexo2	RNA exonuclease 2	-0.67	-0.67	0.00057045	0.027104
Tdo2	tryptophan 2,3-dioxygenase	-3.78	-5	0.0005723	0.027104
Gm13835	predicted gene 13835	-0.89	-0.9	0.00057921	0.0272962
Gdpd3	glycerophosphodiester phosphodiesterase domain containing 3	1.28	1.3	0.00058528	0.0275098
Slc25a34	solute carrier family 25 member 34	-3.08	-3.64	0.00058875	0.0276002
Macrod2	MACRO domain containing 2	-3.23	-3.87	0.00059903	0.027936
Rpl27a-ps2	ribosomal protein L27A, pseudogene 2	1.92	2.01	0.00059805	0.027936
Rnf121	ring finger protein 121	-0.38	-0.38	0.00061295	0.0285109
Maff	MAF bZIP transcription factor F	1.11	1.13	0.00061577	0.028568
Tgfbr2	transforming growth factor beta receptor 2	0.87	0.88	0.00063875	0.0295576
Slc26a4	solute carrier family 26 member 4	-2.61	-2.93	0.00064618	0.0298244
Hnmt	histamine N-methyltransferase	-2.77	-3.14	0.00066165	0.0304599
Pls3	plastin 3	-2.49	-2.74	0.00066596	0.0305793
Ano4	anoctamin 4	-4.15	-6.03	0.00067564	0.0309406
Ccnd1	cyclin D1	-2.15	-2.31	0.00067728	0.0309406
Zim1	zinc finger, imprinted 1	3	3.44	0.00068222	0.0310869
AU040320	KIAA0319 like	0.69	0.69	0.0006858	0.0311709
Tstd1	thiosulfate sulfurtransferase like domain containing 1	-2.42	-2.69	0.00069048	0.0313039
Prss34	protease, serine 34	3.47	4.51	0.00069737	0.0315368
Eif2ak3	eukaryotic translation initiation factor 2 alpha kinase 3	0.82	0.83	0.00070285	0.0317045
Gm15962	predicted gene 15962	-4.05	-5.96	0.00070869	0.0318874
Acss3	acyl-CoA synthetase short chain family member 3	-3.08	-3.6	0.00072579	0.0324722
Gm7331	predicted gene 7331	-3.64	-4.61	0.00072916	0.0324722
Nodal	nodal growth differentiation factor	2.3	2.49	0.0007281	0.0324722
Slc5a1	solute carrier family 5 member 1	-3.68	-4.93	0.00073075	0.0324722
Spryd7	SPRY domain containing 7	-0.61	-0.61	0.00073034	0.0324722
Nlgn3	neuroligin 3	3.33	4.05	0.0007355	0.0326023
Hao1	hydroxyacid oxidase 1	-3.17	-3.85	0.00074801	0.0330751
Slc29a1	solute carrier family 29 member 1 (Augustine blood group)	-0.9	-0.91	0.00075009	0.0330854
Alad	aminolevulinate dehydratase	-1.04	-1.05	0.00076463	0.0336402
Enho	energy homeostasis associated	-2.98	-3.51	0.00076643	0.0336402
Asic5	acid sensing ion channel subunit family member 5	-3.77	-5.28	0.00077275	0.0336559
Bivm	basic, immunoglobulin-like variable motif containing	-0.47	-0.47	0.0007699	0.0336559
Cyp2d37-ps	cytochrome P450, family 2, subfamily d, polypeptide 37, pseudogene	-2.56	-2.86	0.0007743	0.0336559
Egln1	egl-9 family hypoxia inducible factor 1	0.74	0.75	0.00077375	0.0336559
Snx12	sorting nexin 12	0.51	0.51	0.00077768	0.0337207
Slfn14	schlafen family member 14	2.95	3.41	0.00078031	0.0337532
Psmd2	proteasome 26S subunit, non-ATPase 2	-0.46	-0.46	0.00078411	0.0338356
Chst14	carbohydrate sulfotransferase 14	0.81	0.81	0.00079317	0.0341446
Smarca2	SWI/SNF related, matrix associated, actin dependent regulator of chromatin, subfamily a, member 2	-2.54	-2.82	0.00080201	0.0344424
Cxcr2	C-X-C motif chemokine receptor 2	2.28	2.48	0.00081632	0.0349726
Btnl10	butyrophilin-like 10	3.07	3.59	0.00082181	0.0351242
Rbpms	RNA binding protein, mRNA processing factor	0.85	0.86	0.00084144	0.0357921
Rdh16f2	RDH16 family member 2	-3.39	-4.23	0.00084084	0.0357921
AC123954.1		-0.85	-0.85	0.00085024	0.0358404
AC160051.1		-2.91	-3.62	0.00085574	0.0358404
Acsm1	acyl-CoA synthetase medium chain family member 1	-2.77	-3.13	0.00085363	0.0358404
F930017D23Rik	RIKEN cDNA F930017D23 gene	3.5	4.56	0.00084974	0.0358404
Gm14261	predicted gene 14261	2.9	3.45	0.00085658	0.0358404
Hsd3b3	hydroxy-delta-5-steroid dehydrogenase, 3 beta- and steroid delta-isomerase 1	-2.95	-3.49	0.00085102	0.0358404
Saa1	serum amyloid A1	-3.33	-4.13	0.00085359	0.0358404
AC125484.1		-3.22	-4.01	0.00086126	0.0359522
Ccdc25	coiled-coil domain containing 25	-0.51	-0.51	0.0008705	0.0361693
Pkhd1l1	PKHD1 like 1	2.58	2.87	0.00086857	0.0361693
Ltf	lactotransferrin	2.46	2.69	0.00087499	0.0361877
Rpl23a	ribosomal protein L23A	-1.33	-1.35	0.00087356	0.0361877
Pcyt1b	phosphate cytidylyltransferase 1, choline, beta	2.38	2.68	0.00090873	0.0374968
Zfyve28	zinc finger FYVE-type containing 28	-2.74	-3.03	0.00091266	0.0375722
Tmcc2	transmembrane and coiled-coil domain family 2	2.04	2.17	0.00091476	0.0375725
Slc27a5	solute carrier family 27 member 5	-3.03	-3.58	0.0009204	0.0377172
AC154597.1		2.61	2.85	0.00093906	0.0380961
Apod	apolipoprotein D	3.35	4.67	0.0009461	0.0380961
Arid3b	AT-rich interaction domain 3B	0.8	0.81	0.00094605	0.0380961
Olfm4	olfactomedin 4	3.19	4.02	0.00094299	0.0380961
Pon3	paraoxonase 3	-2.46	-2.73	0.0009399	0.0380961
Ptpn7	protein tyrosine phosphatase, non-receptor type 7	1.77	1.85	0.00094398	0.0380961
Rasl12	RAS like family 12	1.73	1.8	0.00093896	0.0380961
Stk16	serine/threonine kinase 16	-0.74	-0.75	0.00094666	0.0380961
Cebpe	CCAAT/enhancer binding protein epsilon	3.4	4.41	0.00094996	0.0381433
Gstk1	glutathione S-transferase kappa 1	-2.67	-3.03	0.00095484	0.0382533
A2m	alpha-2-macroglobulin	1.82	1.91	0.00096362	0.0385192
Rpe	ribulose-5-phosphate-3-epimerase	-0.46	-0.46	0.00097021	0.0386961
Tat	tyrosine aminotransferase	-3.46	-4.58	0.00097674	0.0388697
Plekha4	pleckstrin homology domain containing A4	1.22	1.24	0.00098219	0.039
Reps2	RALBP1 associated Eps domain containing 2	-2.74	-3.14	0.00098732	0.0391171
Tlr5	toll like receptor 5	-2.59	-2.9	0.00100229	0.0396224
Gm44250	predicted gene, 44250	-2.51	-2.8	0.00101267	0.0399448
Fam136a	family with sequence similarity 136 member A	-0.82	-0.83	0.00102254	0.0401571
Sbds	SBDS, ribosome maturation factor	-0.47	-0.47	0.00102043	0.0401571
Prkag2	protein kinase AMP-activated non-catalytic subunit gamma 2	-0.62	-0.62	0.0010315	0.040332
Steap3	STEAP3 metalloreductase	1.58	1.64	0.0010306	0.040332
Abcc10	ATP binding cassette subfamily C member 10	0.73	0.73	0.00103642	0.0403483
Atp10d	ATPase, class V, type 10D	0.72	0.72	0.00103462	0.0403483
AF529169	KIAA1024	2.98	3.38	0.0010453	0.0403909
Fibin	fin bud initiation factor homolog (zebrafish)	-2.74	-3.25	0.00104141	0.0403909
Lrrc75b	leucine rich repeat containing 75B	1.46	1.5	0.00104879	0.0403909
Npr2	natriuretic peptide receptor 2	-2.43	-2.68	0.0010471	0.0403909
Slc25a29	solute carrier family 25 member 29	1.15	1.17	0.00104351	0.0403909
Amd-ps4	S-adenosylmethionine decarboxylase, pseudogene 4	-1.98	-2.07	0.00106236	0.0407381
Grik4	glutamate ionotropic receptor kainate type subunit 4	2.94	3.35	0.00106175	0.0407381
Add2	adducin 2	2.76	3.14	0.00106645	0.0408077
Rarres1	retinoic acid receptor responder 1	-2.39	-2.65	0.00107184	0.0409265
2010107G23Rik	family with sequence similarity 241, member B	-2.56	-2.84	0.00107422	0.0409302
Mcpt8	mast cell protease 8	3.4	4.44	0.00109344	0.0414032
Ptges2	prostaglandin E synthase 2	-0.74	-0.74	0.00109153	0.0414032
Rps16	ribosomal protein S16	-1.85	-1.93	0.00109357	0.0414032
Gm10060	predicted gene 10060	-1.87	-1.93	0.00109941	0.0415254
Usp29	ubiquitin specific peptidase 29	2.56	2.84	0.00110144	0.0415254
Snrnp35	small nuclear ribonucleoprotein U11/U12 subunit 35	-0.74	-0.74	0.00110842	0.0417009
Akip1	A-kinase interacting protein 1	-0.91	-0.92	0.00111253	0.0417676
Cyp3a25	cytochrome P450, family 3, subfamily a, polypeptide 25	-3.06	-3.65	0.00112372	0.0420996
Cyp3a59	cytochrome P450, family 3, subfamily a, polypeptide 59	-2.82	-3.24	0.00113006	0.0422487
Acsm5	acyl-CoA synthetase medium chain family member 5	-3.19	-3.88	0.00113716	0.0424253
Cyp4a32	cytochrome P450 family 4 subfamily A member 11	-3.85	-5.65	0.00114025	0.0424523
Gpd2	glycerol-3-phosphate dehydrogenase 2	-1.81	-1.9	0.00114758	0.0426367
Epb42	erythrocyte membrane protein band 4.2	2.98	3.47	0.00115251	0.0426427
Galnt11	polypeptide N-acetylgalactosaminyltransferase 11	0.92	0.93	0.00115229	0.0426427
Nckap5	NCK associated protein 5	1.96	2.08	0.00118552	0.0437737
CT571252.1		-2.14	-2.26	0.00120229	0.0442498
Prr16	proline rich 16	-3.6	-4.86	0.00120335	0.0442498
Scp2	sterol carrier protein 2	-1.93	-2.05	0.00120805	0.0442524
Tmem268	transmembrane protein 268	0.95	0.96	0.00120837	0.0442524
Gas1	growth arrest specific 1	-2.49	-2.81	0.00122859	0.0448738
Rpl31-ps1	ribosomal protein L31, pseudogene 1	1.61	1.67	0.00123035	0.0448738
Fndc3b	fibronectin type III domain containing 3B	1.05	1.06	0.00124554	0.0453355
Dsg1c	desmoglein 1 gamma	-3.34	-4.08	0.00126388	0.0459098
Alox5	arachidonate 5-lipoxygenase	2.35	2.6	0.00127957	0.0463858
Agxt	alanine-glyoxylate aminotransferase	-2.36	-2.61	0.00128796	0.0465956
Atp11c	ATPase phospholipid transporting 11C	-1.83	-1.93	0.00129336	0.0466964
Atoh8	atonal bHLH transcription factor 8	-2.88	-3.39	0.00130547	0.0467623
Chrnb2	cholinergic receptor nicotinic beta 2 subunit	-2.33	-2.55	0.00130563	0.0467623
Lypd8	LY6/PLAUR domain containing 8	2.79	3.18	0.00129781	0.0467623
Nfe2	nuclear factor, erythroid 2	2.23	2.41	0.00130428	0.0467623
Egfr	epidermal growth factor receptor	-3.18	-3.89	0.00131291	0.0469294
Ly6g	lymphocyte antigen 6 complex, locus A	3.43	4.7	0.00132217	0.047166
Raet1d	retinoic acid early transcript delta	-3.6	-5.26	0.00133108	0.0473896
Gm13443	predicted gene 13443	-1.18	-1.21	0.00135741	0.0479457
Igf1	insulin like growth factor 1	-2.38	-2.62	0.00135737	0.0479457
Lamb1	laminin subunit beta 1	2.06	2.2	0.00135328	0.0479457
Paip1	poly(A) binding protein interacting protein 1	-0.61	-0.61	0.00135043	0.0479457
Apol8	apolipoprotein L2	2.85	3.3	0.00137219	0.0482774
Calcr	calcitonin receptor	-4.21	-8.24	0.00137114	0.0482774
Serinc2	serine incorporator 2	-2	-2.15	0.00137809	0.0483898
Rtl1	retrotransposon Gag like 1	2.71	3.07	0.00139249	0.0487259
Sult1b1	sulfotransferase family 1B member 1	-2.44	-2.72	0.0013931	0.0487259
Peg3	paternally expressed 3	2.21	2.39	0.00140263	0.0489636
Lin28b	lin-28 homolog B	3.91	5.63	0.00142922	0.0497947
