# Supplementary material for: MYC and Twist1 cooperate to drive metastasis by eliciting crosstalk between cancer and innate immunity
Source: eLife. 2020 Jan 14;9:e50731. doi: 10.7554/eLife.50731 (PMC6959993; doi:10.7554/eLife.50731)
Supplement: Supplementary file 2. [file elife-50731-supp2.xlsx]

## Sheet: Sheet1
Functions Annotation	p-Value	Activation z-score	Molecules	# Molecules
Inflammation of organ	1.24e-05	2.073	Ace2,Add2,Alox5,Ar,Arfgap3,Atp11c,C6,Ca3,Camp,Cd24a,Cd40,Cebpe,Chil3/Chil4,Chrm3,Chrna2,Chrnb2,Cxcr2,Cyp2e1,Cyp3a5,Egfr,Eif2ak3,Faim,Gp1ba,Gpc3,Gstk1,Gstp1,Hnmt,Hpgd,Hsf2,Ido2,Igf1,Igf1r,Igfbp1,Kel,Lect2,Ltf,Mmp8,Mpo,Mug1/Mug2,Nlrp12,Olfm4,Pf4,Pglyrp1,Pigr,Pld1,Pon1,Pon3,Prkag2,Prom1,Psmd2,Rxrg,S100a8,S100a9,Sbds,Scara5,Scp2,Serinc2,Serpinb1,Slc2a4,Tgfbr2,Tlr5,Tnfsf15,Tram2,Tubb1,Twist1,Ugt1a1	66
Cell movement of myeloid cells	1.77e-05	1.817	Alox5,Angptl2,Aqp9,Ar,C6,Camp,Ccnd1,Cebpe,Ces1,Chil3/Chil4,Ctsg,Cxcr2,Cyp2c8,Cyp2j2,Cyp7a1,Egfr,Egln1,Elane,Ltf,Mmp8,Mpo,Ndrg1,Nlrp12,Olfm4,Pf4,Pigr,Ptger3,S100a8,S100a9,Saa1,Sbds,Serpina3,Serpinb1,Tgfbr2	34
Cell movement of neutrophils	5.97e-05	2.729	Alox5,Aqp9,Camp,Cebpe,Ctsg,Cxcr2,Cyp2c8,Cyp2j2,Egfr,Elane,Mmp8,Mpo,Nlrp12,Pf4,Pigr,Ptger3,S100a8,S100a9,Saa1,Serpinb1,Tgfbr2	21
Recruitment of myeloid cells	0.00066	1.923	Alox5,Camp,Cd40,Ctsg,Cxcr2,Cyp1a2,Elane,Gp1ba,Gpc3,Hao1,Ltf,Mpo,Olr1,S100a8,Tgfbr2,Tlr5,Twist1	17
Chemotaxis of myeloid cells	0.0012	2.17	Alox5,Angptl2,Aqp9,Camp,Ccnd1,Chil3/Chil4,Ctsg,Cxcr2,Elane,Nlrp12,Pf4,Pigr,S100a8,S100a9,Saa1,Serpina3,Serpinb1	17
